# Supplementary material
Source: publisher figshare collection journal article supplement (https://acs.figshare.com/ndownloader/files/28112630)

# Recommendations for Oil Extraction and Refining Process to Prevent the Formation of Monochloropropane-diol Esters in Sunflower Oil

*Karine Redeuil\*, Xanthippe Theurillat, Marine Nicolas, Kornél Nagy*

Société des Produits Nestlé S.A., Nestlé Research Lausanne, Route du Jorat 57, 1000 Lausanne 26, Switzerland

\* To whom correspondence should be addressed:

Karine Meisser Redeuil, Société de Produits Nestlé SA, Nestlé Research Lausanne, EPFL Innovation Park, Building H, CH-1015 Lausanne

Email: [karine.meisser@rdls.nestle.com](mailto:karine.meisser@rdls.nestle.com)

Phone: + 41 21 785 9229

Table S1: Phosphatidylcholine levels at various stages of the refining process of a solvent extracted cake oil

| Type of Oil                     | dipalmitoyl-PC | palmitoyl-oleoyl-PC | dioleoyl-PC | palmitoyl-linoleoyl-PC<br>(PA ratio) | oleoyl-linoleoyl-PC | dilinoleoyl-PC | Sum of PC |
|---------------------------------|----------------|---------------------|-------------|--------------------------------------|---------------------|----------------|-----------|
| SE cake oil                     | 0.07           | 2.31                | 13.32       | 6.25                                 | 7.21                | 17.95          | 47.11     |
| Deg. SE cake oil                | 0.00           | 0.00                | 0.02        | 0.00                                 | 0.01                | 0.01           | 0.04      |
| 1-week cooling SE cake oil      | 0.03           | 1.23                | 7.15        | 3.37                                 | 4.07                | 10.34          | 26.19     |
| 1-week cooling Deg. SE cake oil | 0.00           | 0.00                | 0.07        | 0.03                                 | 0.04                | 0.08           | 0.23      |

## SUPPLEMENTAL FIGURE CAPTIONS

Figure S1: Relative abundance of reported discovered chlorine carrying substances (see Table 1, ion  $[M-H]^-$ ) and levels of sunflower major MCPD diesters formed during the in-vitro heat treatment of crude sunflower oil.

Figure S2: Distribution of chlorine-carrying substances identified in negative ionization mode (A) in various bio sunflower oil fractions.

(peak areas were all normalized to OLL peak area)

Figure S3: Distribution of major MCPDEs (LL, OL, PL, OO) in various bio sunflower oil fractions.

(peak areas were all normalized to their deuterated ISTD peak area)

Figure S4: Relative distribution of chlorine carriers class A (A); class B (B); class C (C) and class D (D) along the sunflower refining process. The sum of each carrier class was taken into account and normalized to their internal standard nicarbazin.

Process step identity: A (Crude); B (Degummed); C (Degummed short cooling); D (Degummed short cooling bleached); E (Degummed bleached short cooling); F (Degummed bleached)

Figure S5: Total 2-MCPD (A) and glycidol content (B) along the sunflower refining process.

Process step identity: A (Crude); B (Degummed); C (Degummed short cooling); D (Degummed short cooling bleached); E (Degummed bleached short cooling); F (Degummed bleached)

SUPPLEMENTAL FIGURES

Figure S1

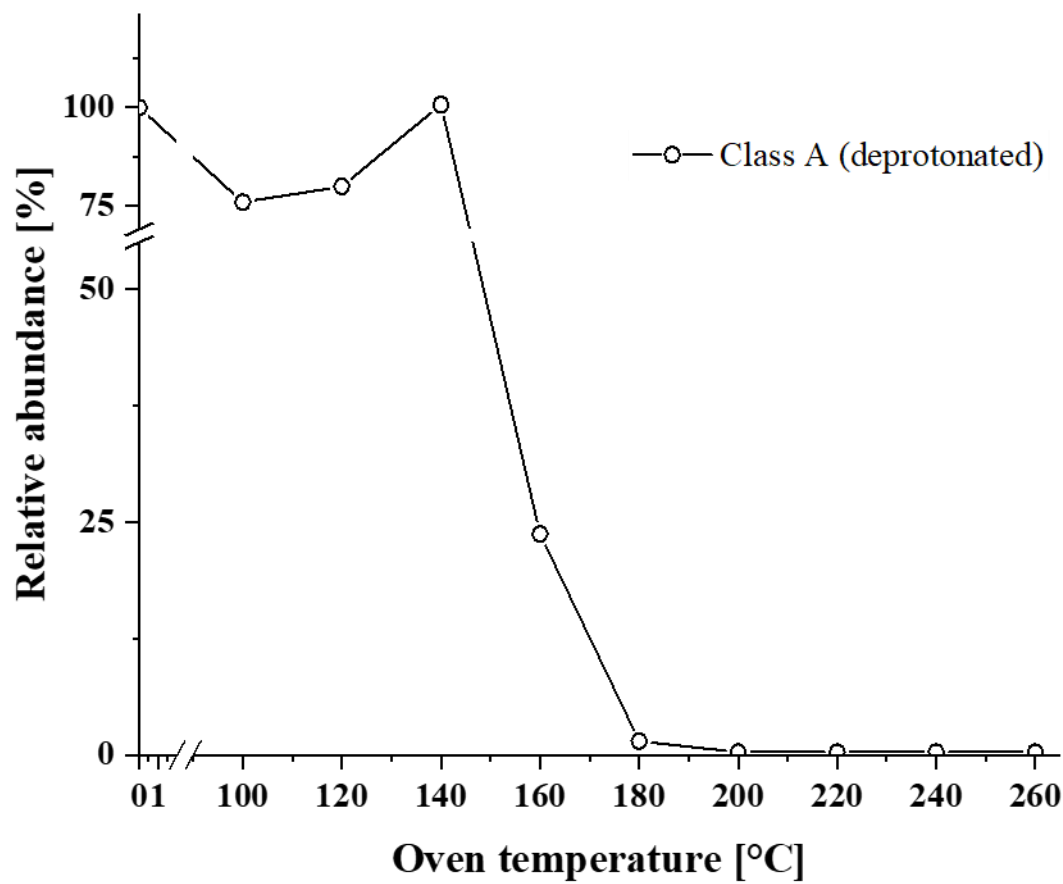

Figure S2

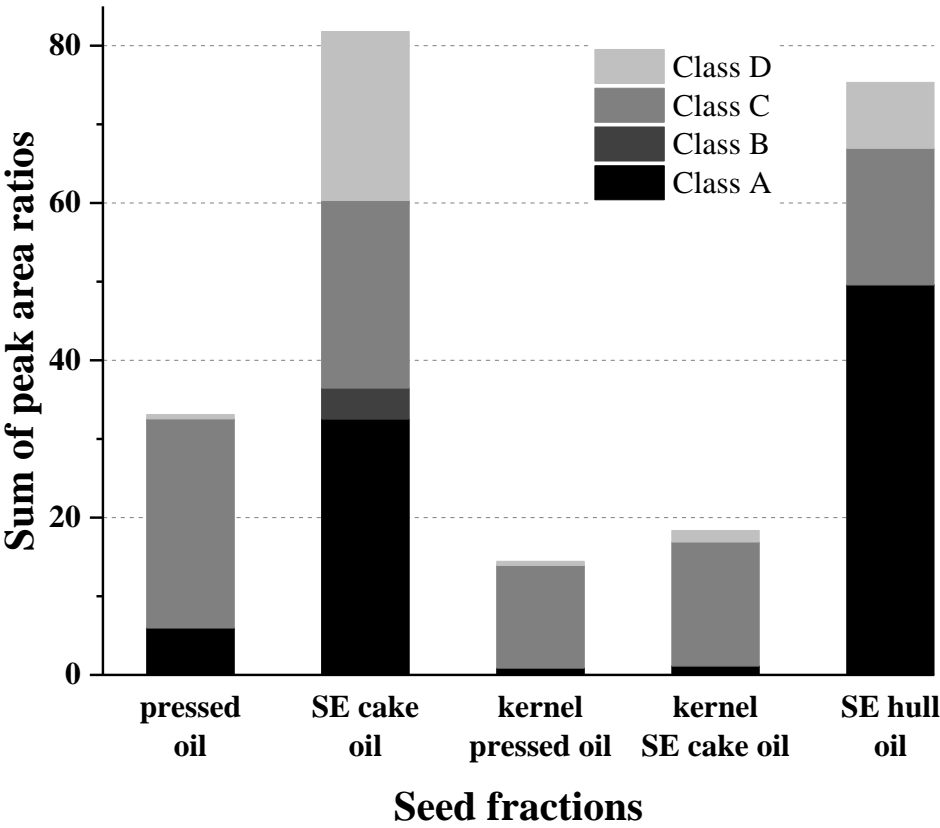

Figure S3

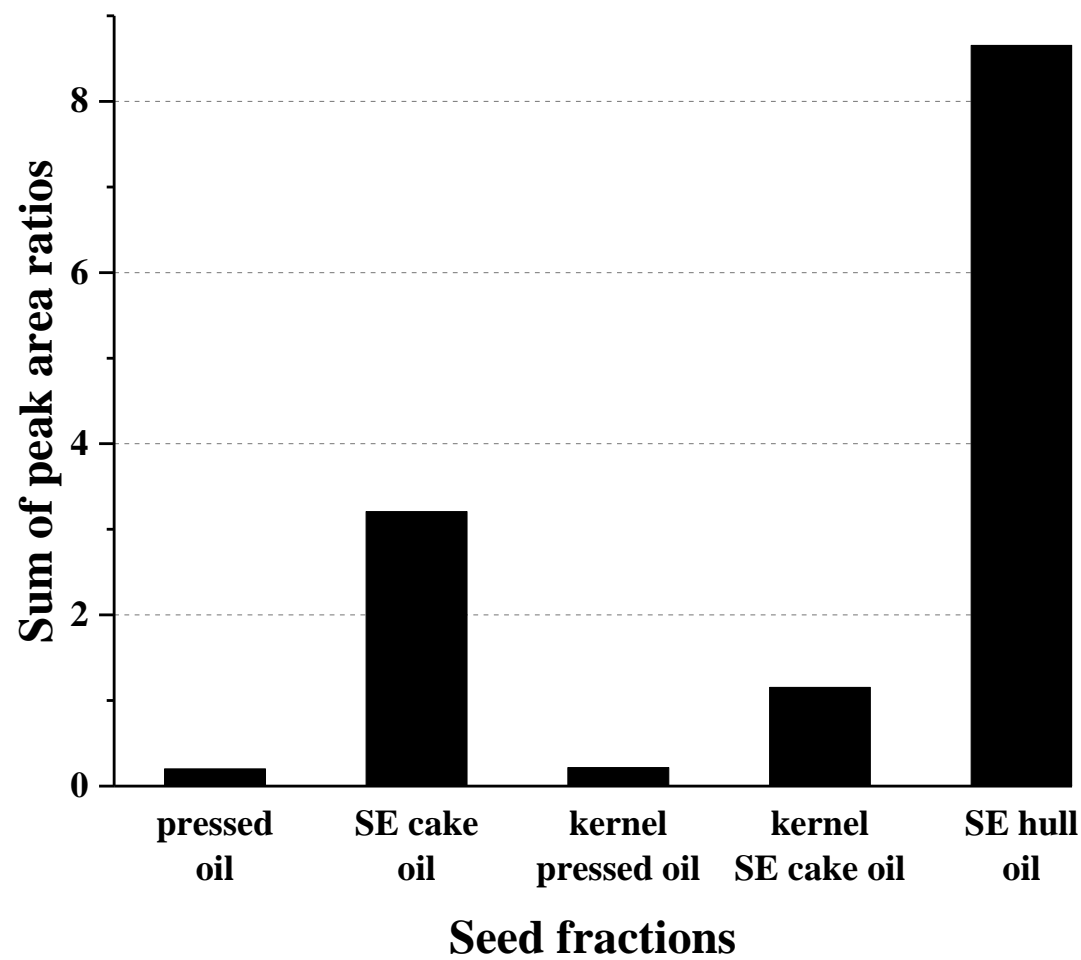

Figure S4

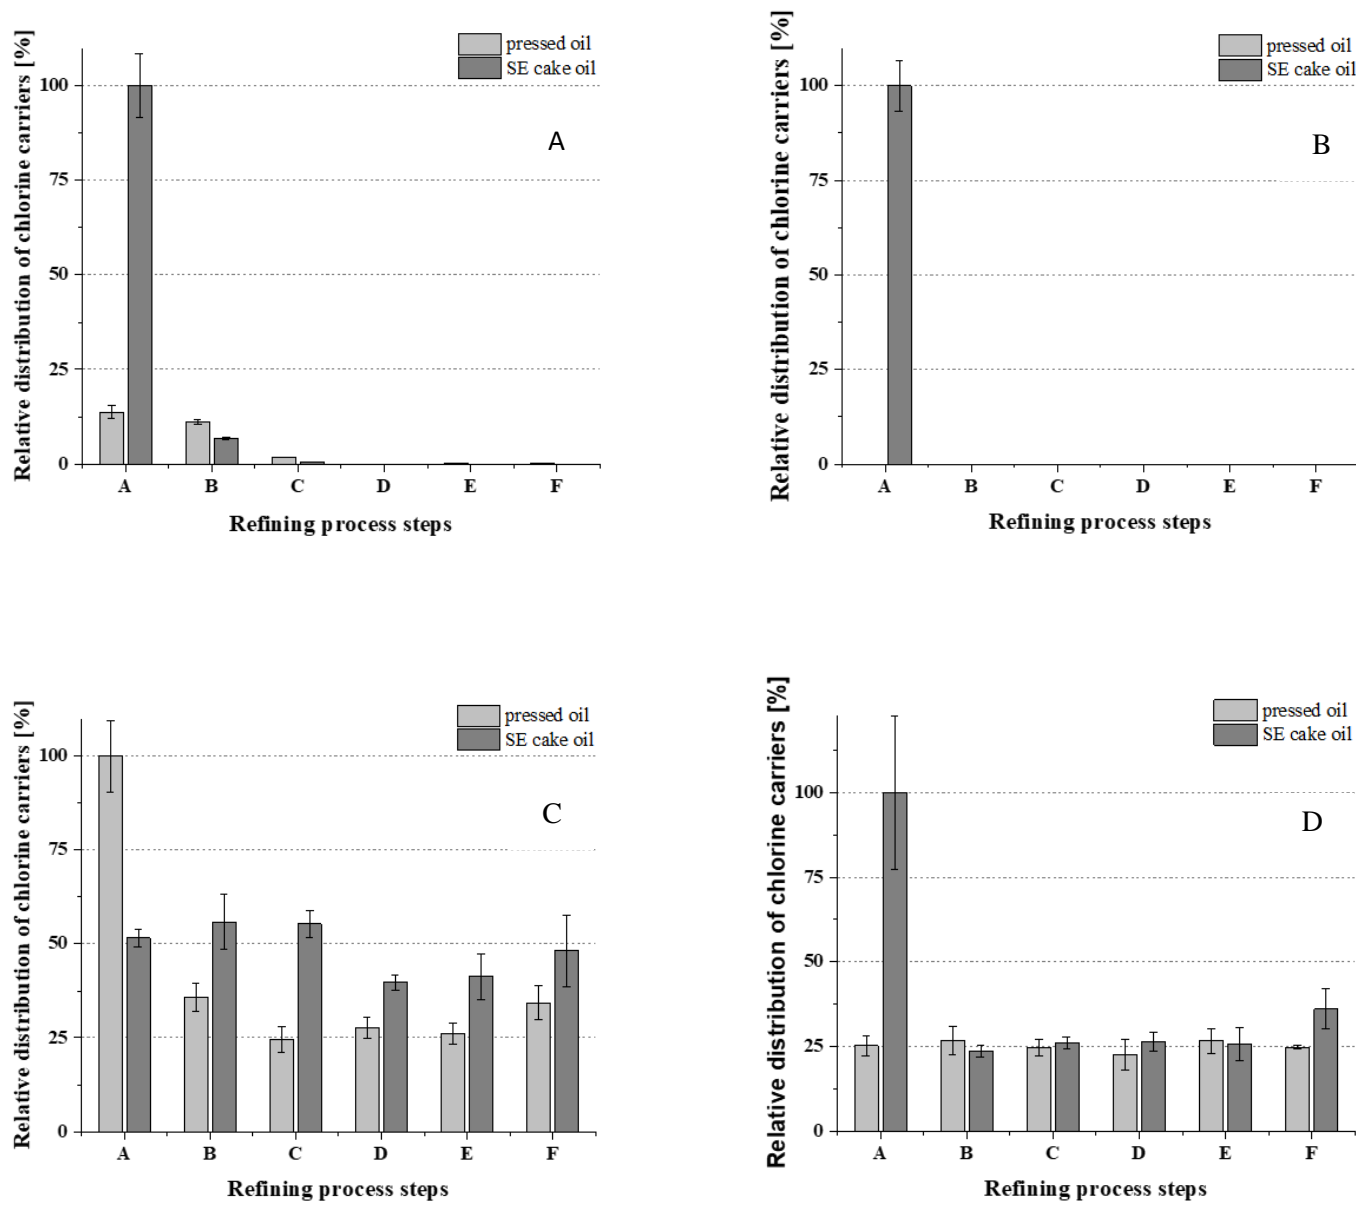

Figure S5

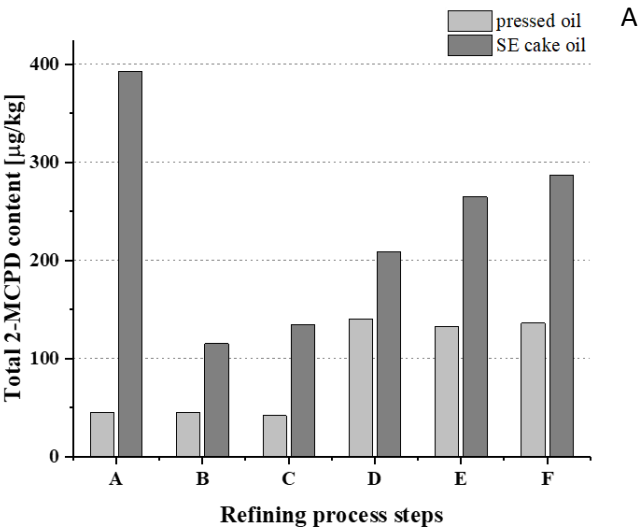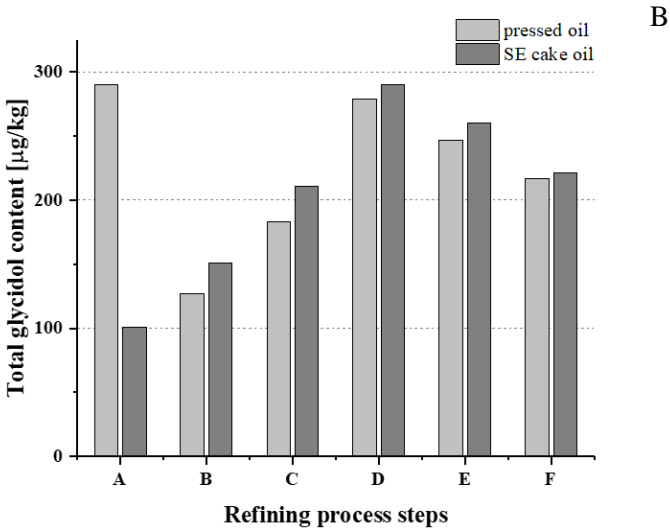

Supplement: Supplementary file 1 [file 28112630]
